# Supplementary material for: Comparison of single-spin to double-spin platelet-rich plasma centrifugation methods in the treatment of androgenic alopecia: a systematic review and meta-analysis of randomized controlled trials
Source: Frontiers journal article supplement (doi:10.3389/fmed.2025.1631087), 2025-07-21
Supplement: Table_1.docx [file Table_1.docx]

**Title Page**

**Comparison of single-spin to double-spin platelet-rich plasma (PRP) centrifugation methods in the treatment of androgenic alopecia: A systematic review and meta-analysis of randomized controlled trials**

**Running title – Single-spin versus double-spin PRP for androgenic alopecia: A meta-analysis**

Laura Ghanem1, *, Najwaa Kirmani2, María Paula Palacios-Ortiz3, Martin Cevallos-Cueva4, Daniela Lucía Mendoza-Millán5,6, Gabriel Victor Almeida Nascimento7, Virginia Velasco-Tamariz8

1 Faculty of Medical Sciences, Lebanese University, Beirut, Lebanon.

2 Dow Medical College, Karachi, Pakistan.

3 Universidad San Francisco de Quito, Ecuador.

4 School of Medicine, Universidad Central del Ecuador, Quito, Ecuador.

5 Department of Dermatology, Harvard Medical School, Boston, Massachusetts.

6 Department of Dermatology, Beth Israel Deaconess Medical Center, Boston, Massachusetts.

7 Universidade Ceuma Campus Imperatriz, Maranhão, Brasil.

8 Dermatology Department, Hospital Universitario 12 de Octubre, I+12 Research Institute, Universidad Complutense, Madrid, Spain

*** Correspondence:**

Laura Ghanem

Department of Medicine,

Faculty of Medical Sciences, Lebanese University

Beirut, Lebanon

Email : [lauraghanem33@gmail.com](mailto:lauraghanem33@gmail.com)

1. **Laura Ghanem***

Email: [lauraghanem33@gmail.com](mailto:lauraghanem33@gmail.com)

ORCID: 0009-0009-7918-0107

Affiliation: Faculty of Medical Sciences, Lebanese University, Beirut, Lebanon.

1. **Najwaa Kirmani**

Email: [mimikirmani1@gmail.com](mailto:mimikirmani1@gmail.com)

ORCID: 0009-0006-4936-7008

Affiliation: Dow Medical College, Karachi, Pakistan.

1. **María Paula Palacios-Ortiz**

Email: [mppalaciosortiz@gmail.com](mailto:mppalaciosortiz@gmail.com)

ORCID: 0009-0002-3589-4318

Affiliation: Universidad San Francisco de Quito, Ecuador.

1. **Martin Cevallos-Cueva**

Email: [martincevallos593@gmail.com](mailto:martincevallos593@gmail.com)

ORCID: 0000-0002-6737-9305

Affiliation: School of Medicine, Universidad Central del Ecuador, Quito, Ecuador

1. **Daniela Lucía Mendoza-Millán**

Email: [dmendoz7@bidmc.harvard.edu](mailto:dmendoz7@bidmc.harvard.edu)

ORCID: 0000-0003-1481-5166

Affiliation: 1. Department of Dermatology, Harvard Medical School, Boston, Massachusetts

2. Department of Dermatology, Beth Israel Deaconess Medical Center, Boston, Massachusetts

1. **Gabriel Victor Almeida Nascimento**

Email: [Gabrielvictor_370@hotmail.com](mailto:Gabrielvictor_370@hotmail.com)

ORCID: 0009-0003-4611-963X

Affiliation: Universidade Ceuma Campus Imperatriz, Maranhão, Brasil.

1. **Virginia Velasco-Tamariz**

Email: [virginia.velasco@salud.madrid.org](mailto:virginia.velasco@salud.madrid.org)

ORCID: 0000-0003-4009-0525

Affiliation: Dermatology Department, Hospital Universitario 12 de Octubre, I+12 Research Institute, Universidad Complutense, Madrid, Spain

- **Manuscript word count: 2664**
- **Figures count: 5**
- **Tables count: 1**
- **Data availability:** All data analyzed in this meta-analysis were obtained from studies retrieved from PubMed (https://pubmed.ncbi.nlm.nih.gov), Embase (www.embase.com), and the Cochrane Library (www.cochranelibrary.com). All supporting data from the included studies are publicly available and are cited within the manuscript. The dataset generated and analyzed during this study has been provided in an Excel document, and uploaded under the name “Data Extraction” alongside this manuscript.
- **Ethics statement:** Not applicable.
- **Author contributions:** LG: Conceptualization, Data curation, Formal analysis, Investigation, Methodology, Project administration, Software, Visualization, Writing - review & editing. NK: Data curation, Formal analysis, Investigation, Methodology, Writing - original draft. MP: Investigation, Writing - original draft. MC: Investigation, Formal analysis, Writing - original draft. DM: Investigation, Writing - original draft. GN: Formal analysis, Writing - original draft. VT: Formal analysis, Supervision, Validation, Writing - review & editing.
- **Funding**: This research did not receive any specific grant from funding agencies in the public, commercial, or not-for-profit sectors.
- **Acknowledgments**: none.
- **Conflict of interest**: The authors declare that there is no conflict of interest.

## Generative AI statement: The authors declare that no Generative AI was used in the creation of this manuscript.
